# Supplementary material for: A narrowband red-emitting asymmetric iridium(iii) complex featuring B- and N-embedded π-conjugation units: structure, photophysics and OLED application
Source: Royal Society of Chemistry journal article supplement (doi:10.1039/d2qi02377f), 2022-12-24
Supplement: d2qi02377f1.pdf [file d2qi02377f1.pdf]

## Electronic Supplementary Information

### **A Narrowband Red-Emitting Asymmetric Iridium(III) Complex Featuring B- and N-Embedded $\pi$ -Conjugation Units: Structure, Photophysics and OLED Application**

Meng Wu,<sup>1</sup> Nengquan Li,<sup>2</sup> Chao Shi,<sup>1\*</sup> Jialiang Song,<sup>1</sup> Ruoqi Zeng,<sup>1</sup> Feiyang Li,<sup>1</sup> Qiuxia Li,<sup>1\*</sup> Aihua Yuan<sup>1</sup> and Chuluo Yang<sup>2\*</sup>

<sup>1</sup> School of Environmental and Chemical Engineering, Jiangsu University of Science and Technology, Zhenjiang 212003, P. R. China.

<sup>2</sup> College of Materials Science and Engineering, Shenzhen University, Shenzhen 518060, P. R. China.

#### **Corresponding Authors' E-mail address**

\* shichao@just.edu.cn

\* liqiuxia2019@just.edu.cn

\* clyang@szu.edu.cn

#### **Contents:**

|                                              |            |
|----------------------------------------------|------------|
| <b>General information.....</b>              | <b>S2</b>  |
| <b>Synthesis and characterization.....</b>   | <b>S2</b>  |
| <b>X-ray crystal structure analysis.....</b> | <b>S3</b>  |
| <b>Photophysical properties.....</b>         | <b>S5</b>  |
| <b>DFT calculation.....</b>                  | <b>S7</b>  |
| <b>OLED Device characterization.....</b>     | <b>S9</b>  |
| <b>TG analysis.....</b>                      | <b>S10</b> |
| <b>References.....</b>                       | <b>S12</b> |

## General information

Unless noted, all reagents or solvents were obtained from commercial suppliers and used without further purification. All air sensitive experiments were performed in  $N_2$  atmosphere through schlenk technology. The ligands **L1** and **L2** were synthesized according to literature procedures<sup>1</sup>. The  $^1H$  NMR and  $^{13}C$  NMR spectra were measured by using a Bruker 400 MHz spectrometer at room temperature. Mass spectra was conducted at Thermo QE Orbitrap HDMS. An Edinburgh FS5 spectrofluorometer was used to measure phosphorescence spectral (the slit is set to 2 nm). An Edinburgh FLS-980 spectrometer was used to determine phosphorescence quantum efficiency and lifetimes of the molecule. The PS films (1 wt%) of all the iridium complexes are made by evaporating their  $CH_2Cl_2$  solution in a round-bottomed glass vial. The experiments for cyclic voltametric were performed by using three electrode cell assemblies from an IM6ex instrument (Zahner). A one-compartment cell equipped with a platinum wire counter electrode, a  $Ag/Ag^+$  reference electrode, and a glassy-carbon working electrode was used for all measurements with a scan rate of  $100\text{ mVs}^{-1}$ . The concentration of tetrabutylammonium hexafluorophosphate ( $Bu_4NPF_6$ ) in dichloromethane solution a was  $0.10\text{ molL}^{-1}$  and used as supporting electrolyte.

## Synthesis and characterization

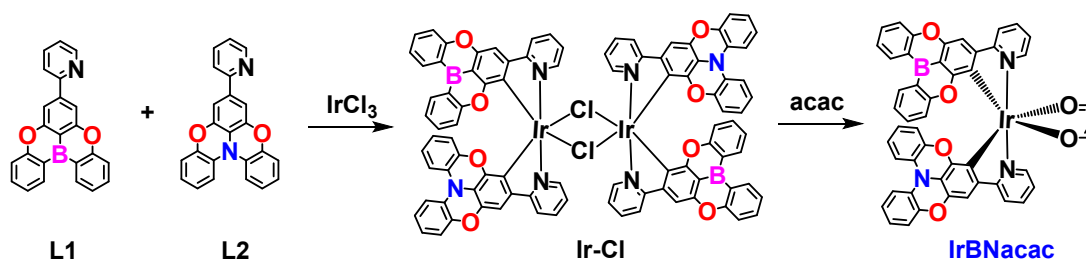

**Figure S1.** The synthetic routes for the asymmetric heteroleptic iridium complex **IrBNacac**.

**IrBNacac:** L-2 (0.042 g, 0.12 mmol), L-1 (0.041 g, 0.12 mmol) and  $IrCl_3$  (0.035 g, 0.1 mmol) were charged to a 100 mL double-neck reaction bottle, followed by mixture of 2-ethoxyethanol (9 mL) and  $H_2O$  (3 mL). The mixture was heated to  $110\text{ }^\circ C$  for 24 h under  $N_2$ . Water (100 mL) was added and the resulting precipitate was filtered. The product has been washed three times with water and dried to give chloro-bridged dimer complex **Ir-Cl** without further purification. The chloro-bridged dimer complex **Ir-Cl** (0.185 g, 0.1 mmol), acetylacetonone (0.05 mL, 0.5 mmol) and  $Na_2CO_3$  (0.053 g, 0.5 mmol) were charged

to a 100 mL schlenck tube, followed by 2-ethoxyethanol (10 mL). The mixture was heated to 60 °C for 24 h under N<sub>2</sub>. The resulting solution was saturated with water and extracted with CH<sub>2</sub>Cl<sub>2</sub> three times. The combined organic phase was dried and concentrated in vacuum, and target product was purified by column chromatography on silica gel with CH<sub>2</sub>Cl<sub>2</sub>/ petroleum ether 3:2 (v/v) to afford red solid. 59 mg (30 %). <sup>1</sup>H NMR (400 MHz, CD<sub>2</sub>Cl<sub>2</sub>) δ 8.56 (m, 2H), 8.50 (m, 2H), 8.22 (d, J = 7.9 Hz, 1H), 7.97 (t, J = 7.1 Hz, 2H), 7.75 (s, 1H), 7.64 (m, 1H), 7.46 (m, 1H), 7.38 (m, 2H), 7.26 (m, 3H), 7.16 (m, 2H), 6.85 (m, 8H), 5.79 (d, J = 8.4 Hz, 1H), 5.29 (s, 1H), 1.79 (s, 3H), 1.73 (s, 3H). <sup>13</sup>C NMR (101 MHz, CD<sub>2</sub>Cl<sub>2</sub>) δ 185.22, 185.16, 169.01, 161.81, 161.14, 153.47, 149.66, 149.40, 148.01, 137.68, 137.36, 135.18, 134.60, 133.73, 133.43, 123.59, 123.40, 122.95, 122.55, 122.24, 121.21, 120.40, 119.53, 119.05, 118.45, 117.41, 117.12, 115.29, 114.78, 107.95, 104.53, 101.03, 28.88, 28.79. C<sub>51</sub>H<sub>33</sub>BlrN<sub>3</sub>O<sub>6</sub> calcd: C, 62.07; N, 4.26; H, 3.37. Found: C, 62.04; N, 4.23; H, 3.39. HR-MS: m/z calcd for C<sub>51</sub>H<sub>33</sub>BlrN<sub>3</sub>O<sub>6</sub> [M+H]<sup>+</sup>: 988.2092. Found: 988.2170.

## X-ray crystal structure analysis

The single-crystal of **IrBNacac** was obtained by slow diffusion of ethanol to its CH<sub>2</sub>Cl<sub>2</sub> solution, respectively. The X-ray diffraction data were collected on a Bruker Smart CCD Apex DUO diffractometer with graphite monochromated Mo K $\alpha$  radiation ( $\lambda$  = 0.71073 Å) using the  $\omega$ -2 $\theta$  scan mode. All crystal datas are deposited in The Cambridge Crystallographic Data Centre (CCDC: 2209564 for **IrBNacac**).

**Table S1.** Crystallographic data for **IrBNacac**.

| Complex           | <b>IrBNacac</b>                                                                                           |
|-------------------|-----------------------------------------------------------------------------------------------------------|
| chemical formula  | 2(C <sub>51</sub> H <sub>33</sub> BlrN <sub>3</sub> O <sub>6</sub> ), 3(CH <sub>2</sub> Cl <sub>2</sub> ) |
| formula weight    | 2228.40                                                                                                   |
| crystal size (mm) | 0.08 × 0.10 × 0.11                                                                                        |
| temperature (K)   | 150                                                                                                       |
| radiation         | 0.71073                                                                                                   |
| crystal system    | Triclinic                                                                                                 |
| space group       | P-1                                                                                                       |
| a(Å)              | 12.8234(6)                                                                                                |
| b(Å)              | 13.7765(6)                                                                                                |

|                                       |                                    |
|---------------------------------------|------------------------------------|
| c(Å)                                  | 15.0704(7)                         |
| $\alpha$ (°)                          | 62.941(2)                          |
| $\beta$ (°)                           | 83.140(2)                          |
| $\gamma$ (°)                          | 69.284(2)                          |
| V(Å <sup>3</sup> )                    | 2214.89(18)                        |
| Z                                     | 1                                  |
| $\rho$ (calc) (g/cm <sup>3</sup> )    | 1.671                              |
| F (000)                               | 1106                               |
| absorp.coeff. (mm <sup>-1</sup> )     | 3.253                              |
| $\theta$ range (deg)                  | 2.0 to 25.0                        |
| reflins collected                     | 41809 ( $R_{\text{int}} = 0.089$ ) |
| indep. reflins                        | 7774                               |
| Reflns obs. [ $I > 2\sigma(I)$ ]      | 6654                               |
| data/restr/paras                      | 7774/0/630                         |
| GOF                                   | 1.07                               |
| $R_1/wR_2$ [ $I > 2\sigma(I)$ ]       | 0.0456/0.1169                      |
| $R_1/wR_2$ (all data)                 | 0.0551/0.1258                      |
| larg peak and hole(e/Å <sup>3</sup> ) | 1.35/-0.90                         |

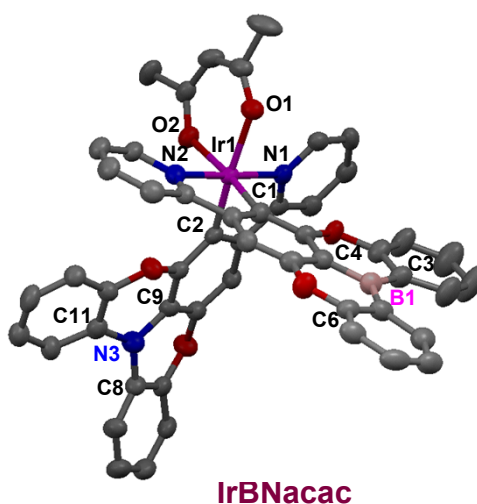

**Figure S2.** The single crystal structure of **IrBNacac**, the hydrogen atoms have been omitted for clarity, selected bond lengths (Å) and angles (°): Ir1–C1: 2.018(7), Ir1–C2: 1.996(8), Ir1–N1: 2.038(7), Ir1–N2: 2.051(7), Ir1–O1: 2.123(5), Ir1–O2: 2.124(6), N3–C11: 1.421(12), N3–C9: 1.423(12), N3–C8: 1.411(11), B1–C6: 1.530(13), B1–C4: 1.507(14), B1–C3: 1.546(14); C1–Ir1–N2: 79.4(3), C2–Ir1–N1:

80.2(3), O1–Ir1–O2: 89.3(2), C1–Ir1–O1: 172.2(3), C2–Ir1–O2: 172.0(3), N1–Ir1–N2: 178.1(3), C8–N3–C11: 126.9(8), C3–B1–C6: 131.6(9).

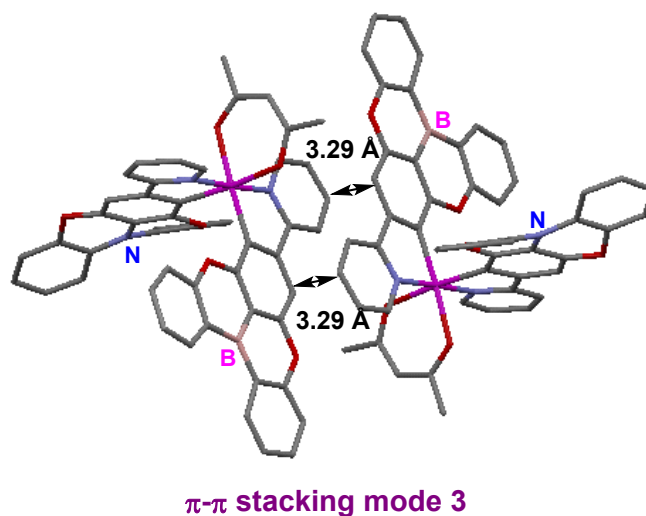

**Figure S3.** The intermolecular interaction of the complex **IrBNacac** in crystal state.

## Photophysical properties

**Table S2** UV–vis absorption data of **IrBNacac** in dichloromethane at 298 K.

| Complex         | $\lambda_{\text{abs}}$ nm (log $\epsilon$ )                      |
|-----------------|------------------------------------------------------------------|
| <b>IrBNacac</b> | 232(4.33), 261(4.35), 329(4.04), 365(3.72), 419(3.66), 530(2.90) |

Measured in dichloromethane at a concentration of  $2.25 \times 10^{-5}$  M, and log  $\epsilon$  values are shown in parentheses at room temperature.

**Table S3** Photophysical properties of **IrBNacac** at 298 K.

| Complex         | PL <sup>[a]/[b]</sup><br>(nm) | $E_{1/2}^{\text{Ox}}$<br>(eV) | $E_g^{\text{[c]}}$<br>(eV) | HOMO/LUMO <sup>[c]</sup> (eV) | $\Phi_{\text{PL}}^{\text{[b]}}$<br>(%) | $\tau^{\text{[b]}}$<br>(ns) |
|-----------------|-------------------------------|-------------------------------|----------------------------|-------------------------------|----------------------------------------|-----------------------------|
| <b>IrBNacac</b> | 625/623                       | 0.11/0.29/0.48                | 2.21                       | -4.91/-2.70                   | 35 %                                   | 6227                        |

<sup>[a]</sup> Recorded in dichloromethane ( $2.55 \times 10^{-5}$  M) at 298 K with an excitation wavelength of 370 nm.  $\Phi_{\text{p}}$  is referred to absolute quantum yields of phosphorescence determined by employing an integrating sphere. <sup>[b]</sup> recorded in PS films (1 wt%) (excitation wavelength 370 nm). <sup>[c]</sup> The HOMO(eV) =  $-(E_{\text{onset}}^{\text{ox}} + 4.8)$ eV,  $E_g = 1240/\lambda$ ,  $\lambda$  is absorption wavelength threshold. LUMO(eV) =  $E_g + \text{HOMO}$

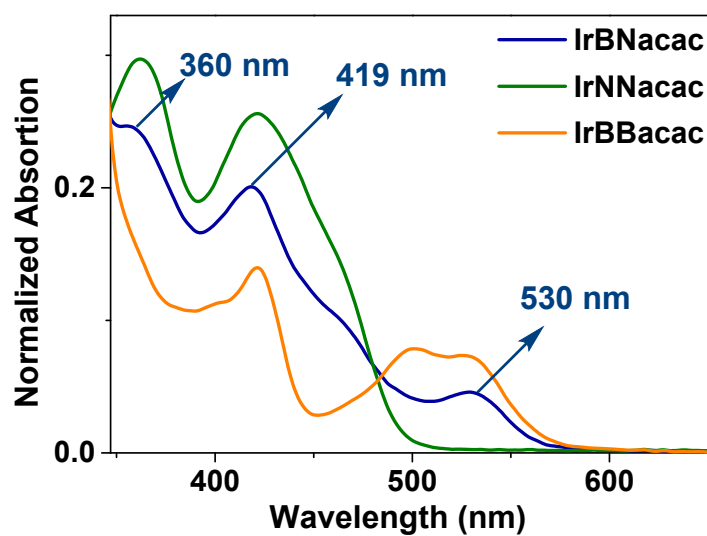

**Figure S4.** Absorption spectra of the iridium complex **IrBNacac** and model iridium complexes (**IrBBacac** and **IrNNacac**) in  $\text{CH}_2\text{Cl}_2$  solution.

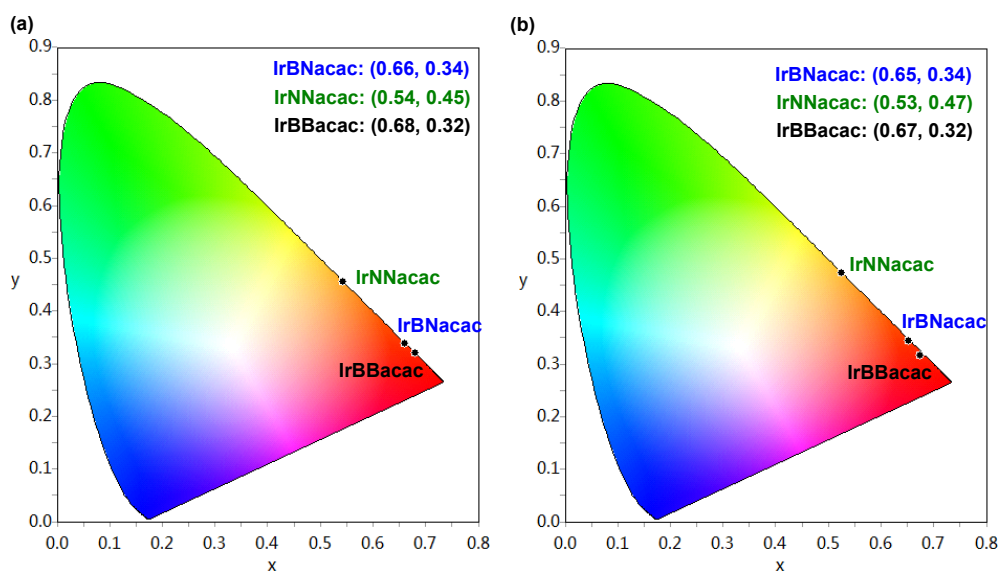

**Figure S5.** The CIE coordinates of photoluminescence spectra of iridium complexes (**IrBNacac**, **IrNNacac** and **IrBBacac**) in (a) dichloromethane solution and (b) PS (1 wt%) films.

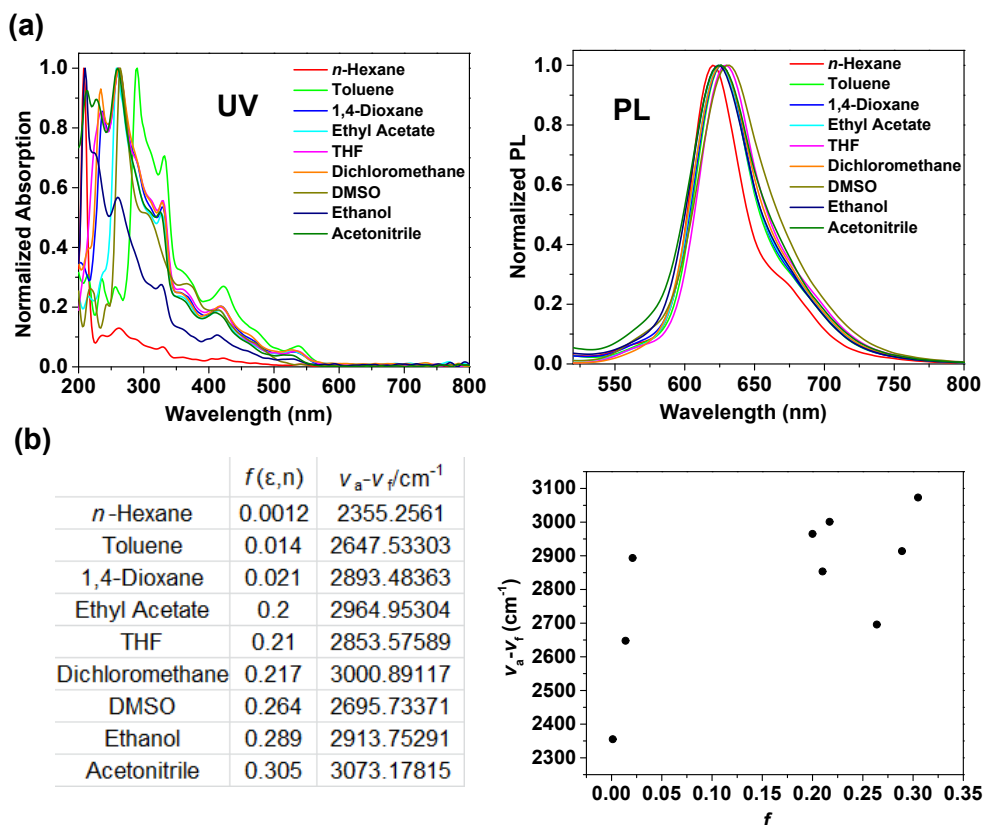

**Figure S6.** (a) The UV-Vis and PL spectrum of the iridium complex **IrBNacac** in different solutions. (b) Mataga–Lippert plots for CT emission of iridium complex **IrBNacac**.

## DFT calculation

DFT method was used to optimize the geometries all the complexes. The electronic transition energies and electron correlation effects were also calculated by (TD)-DFT method with the B3LYP functional (TD-B3LYP). The LANL2DZ basis set was used to treat with the iridium atom, and the 6–31G(d) basis set was used to treat with all other atoms. All calculations were carried out according to the Gaussian 09 program.<sup>2</sup>

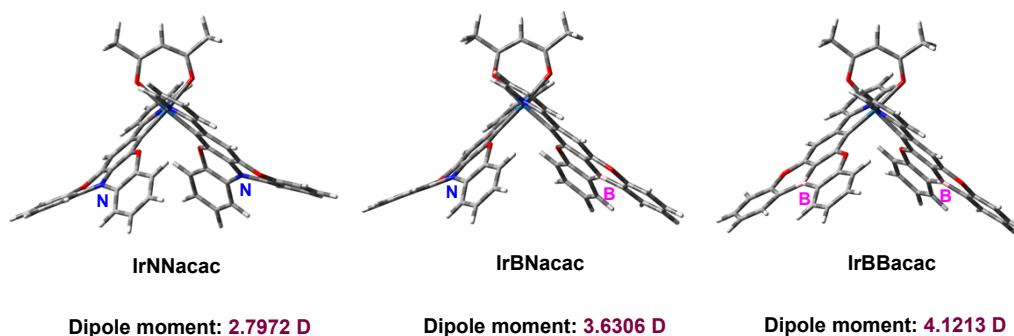

**Figure S7.** Optimized structures and dipole moment for **IrNNacac**, **IrBNacac** and **IrBBacac** at the ground state ( $S_0$ ).

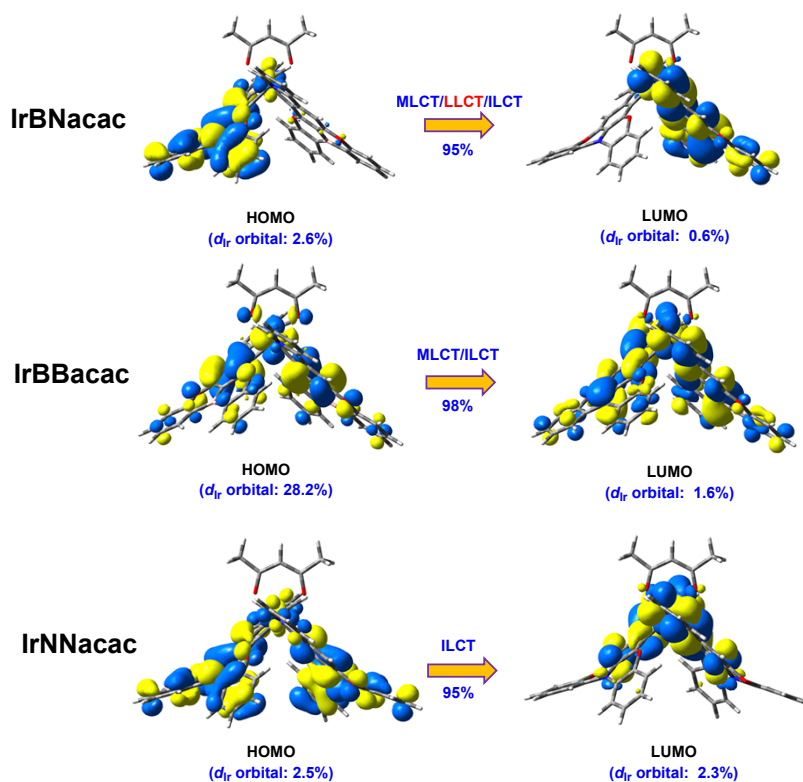

**Figure S8.** The orbital distribution for all the iridium complexes at the  $S_1$  state.

**Table S4.** Calculated energies and oscillator strengths for lowest-energy singlet ( $S_1$ ) and triplet ( $T_1$ ) transitions.

| Complexes | states | E (eV) | Oscillator strength | main configurations (CI coeff)         | Character                                          |
|-----------|--------|--------|---------------------|----------------------------------------|----------------------------------------------------|
| IrBNacac  | $S_1$  | 2.2791 | 0.0081              | HOMO→LUMO (0.95)<br>HOMO-1→LUMO (0.58) | MLCT/LLCT/ ILCT<br>$^3$ MLCT/ $^3$ LLCT/ $^3$ ILCT |
|           | $T_1$  | 1.6327 | 0                   | HOMO→LUMO (0.37)                       | $^3$ MLCT/ $^3$ LLCT/ $^3$ ILCT                    |
| IrBBacac  | $S_1$  | 2.2299 | 0.0001              | HOMO→LUMO (0.98)                       | MLCT/ILCT                                          |
|           | $T_1$  | 1.6023 | 0                   | HOMO→LUMO (0.90)                       | $^3$ MLCT/ $^3$ ILCT                               |
| IrNNacac  | $S_1$  | 2.5890 | 0.0439              | HOMO→LUMO (0.95)                       | ILCT                                               |
|           | $T_1$  | 1.7132 | 0                   | HOMO→LUMO (0.90)                       | $^3$ ILCT                                          |



## OLED Device characterization

Device fabrication: The ITO-coated glass substrates with a sheet resistance of  $15 \Omega \text{ square}^{-1}$  were ultrasonicated sequentially in acetone and ethanol, followed by the treatment in a UV-ozone oven for 10 min. Afterwards, PEDOT:PSS (CLEVIOS P VP AI 4083) was spin-coated onto the ITO substrates at ambient temperature at a speed of 4000 rpm for 40 s (~35 nm). The PEDOT:PSS-coated ITO substrates were then transferred to a glove box with  $\text{N}_2$  atmosphere and baked at  $120 \text{ }^\circ\text{C}$  for 10 min. The emissive layer (using chlorobenzene as the solvent, 10 mg/mL) was spin-coated onto the PEDOT:PSS layer at a speed of 1000 rpm for 30 s (~50 nm), followed by an annealing process ( $80 \text{ }^\circ\text{C}$  for 10 min). Then, the electron-transporting layer (TPBI, 35 nm) were deposited at a rate of  $\sim 2 \text{ \AA/s}$ , electron injecting layer (Liq, 2 nm) at  $\sim 0.2 \text{ \AA/s}$ , and cathode (aluminum, 100 nm) at  $\sim 4 \text{ \AA/s}$  in a vacuum chamber under  $2 \times 10^{-6}$  mbar. The thickness of the spin-coated films were measured by KLA Alpha-Step D-300. The thickness of the deposited films were monitored by an INFICON SQC-310C deposition controller. The devices were tested in ambient environment without encapsulation. The current density-voltage-luminance ( $J$ - $V$ - $L$ ),  $L$ - $EQE$  curves, and electroluminescence spectra were measured using a Keithley 2400 source meter coupled with an absolute EQE measurement system (C9920-12, Hamamatsu Photonics, Japan).

**Table S5.** EL performances of the device for **IrBNacac**.

| <b>Complex</b>  | <b><math>V_{\text{on}}^{\text{a}}</math></b> | <b><math>EQE_{\text{max}}/CE_{\text{max}}/PE_{\text{max}}^{\text{b}}</math></b> | <b><math>\lambda_{\text{ems}}^{\text{c}}</math></b> | <b>CIE<sup>d</sup></b> |
|-----------------|----------------------------------------------|---------------------------------------------------------------------------------|-----------------------------------------------------|------------------------|
|                 | <b>[V]</b>                                   | <b>[%/cd A<sup>-1</sup>/lm W<sup>-1</sup>]</b>                                  | <b>[nm]</b>                                         | <b>(x, y)</b>          |
| <b>IrBNacac</b> | 3.9                                          | 4.9/5.5/3.1                                                                     | 625                                                 | (0.64, 0.35)           |

<sup>a</sup> Voltage in the luminance of  $10 \text{ cd/m}^2$ . <sup>b</sup> Maximum external quantum efficiency ( $EQE_{\text{max}}$ ), maximum current efficiency ( $CE_{\text{max}}$ ), maximum power efficiency ( $PE_{\text{max}}$ ).

<sup>c</sup> Maximum emission wavelength of the EL spectra. <sup>d</sup> The Commission Internationale de l'Eclairage (CIE) coordinates.

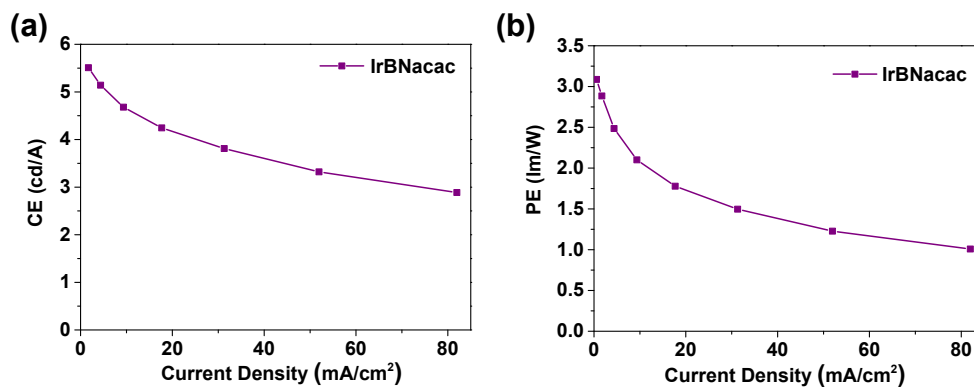

Figure S9. (a) The current efficiency and (b) powder efficiency for device of **IrBNacac**.

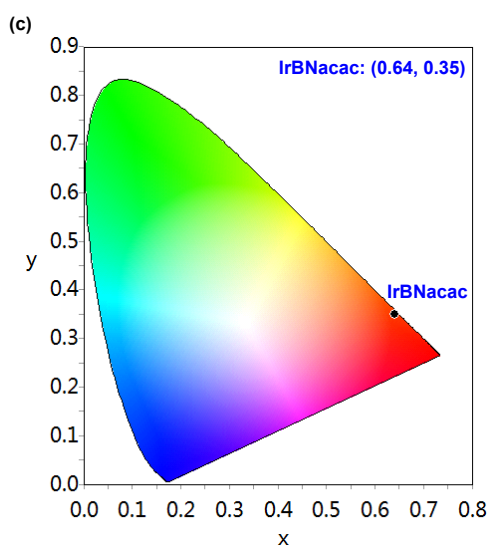

Figure S10. The CIE coordinates of electroluminescence spectra of the complex **IrBNacac** in OLED.

## TG analysis

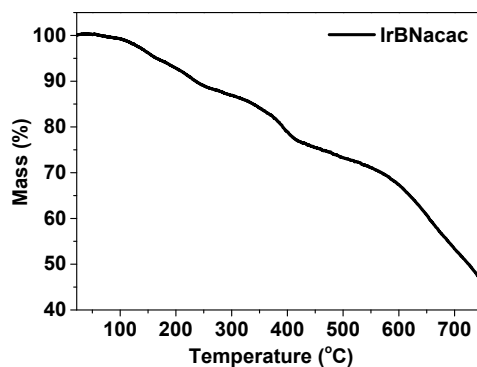

Figure S11. The TG thermograms of the complex **IrBNacac**.

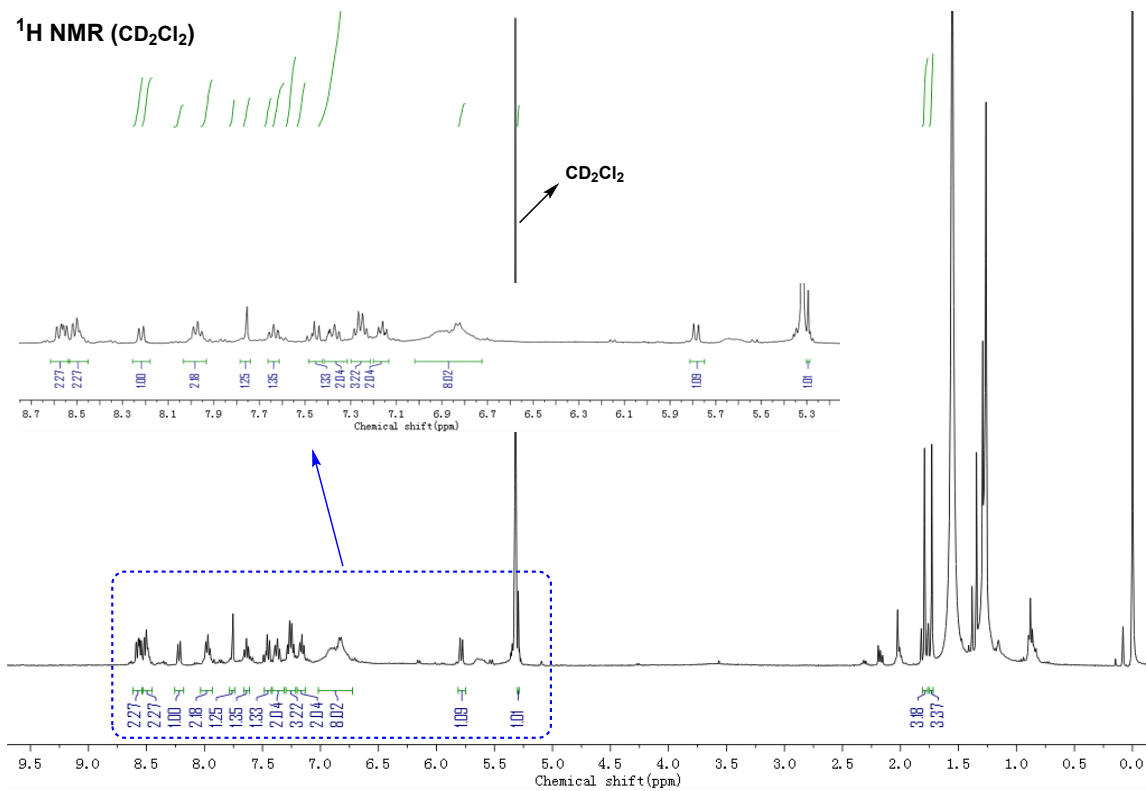

**Figure S13.** The <sup>1</sup>H NMR spectra of the complex IrBNacac.

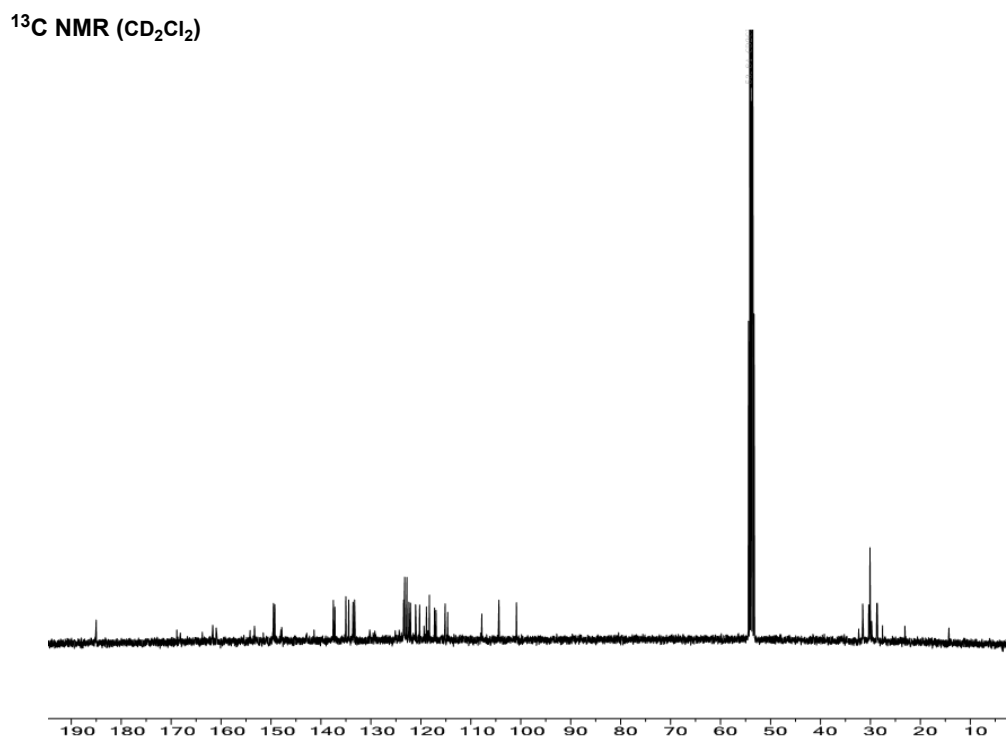

**Figure S14.** The <sup>13</sup>C NMR spectra of the complex IrBNacac.

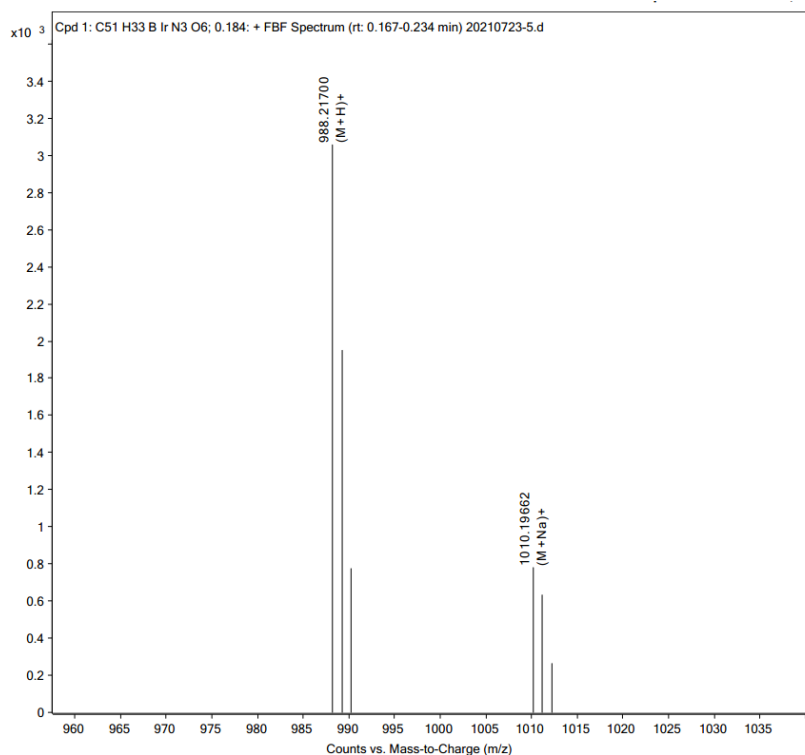

**Figure S15.** The high resolution mass spectrum (HRMS) of the complex **IrBNacac**.

## References

1. Q. Li, C. Shi, M. Huang, X. Wei, H. Yan, C. Yang, A. Yuan, B- and N-embedded color-tunable phosphorescent iridium complexes and B–N Lewis adducts with intriguing structural and optical changes. *Chem. Sci.* **2019**, 10, 3257–3263.
2. M. J. Frisch, G. W. Trucks, H. B. Schlegel, G. E. Scuseria, M. A. Robb, J. R. Cheeseman, G. Scalmani, V. Barone, B. Mennucci, G. A. Petersson, H. Nakatsuji, M. Caricato, X. Li, H. P. Hratchian, A. F. Izmaylov, J. Bloino, G. Zheng, J. L. Sonnenberg, M. Hada, M. Ehara, K. Toyota, R. Fukuda, J. Hasegawa, M. Ishida, T. Nakajima, Y. Honda, O. Kitao, H. Nakai, T. Vreven, J. A. Montgomery Jr., J. E. Peralta, F. Ogliaro, M. Bearpark, J. J. Heyd, E. Brothers, K. N. Kudin, V. N. Staroverov, T. Keith, R. Kobayashi, J. Normand, K. Raghavachari, A. Rendell, J. C. Burant, S. S. Iyengar, J. Tomasi, M. Cossi, N. Rega, J. M. Millam, M. Klene, J. E. Knox, J. B. Cross, V. Bakken, C. Adamo, J. Jaramillo, R. Gomperts, R. E. Stratmann, O. Yazyev, A. J. Austin, R. Cammi, C. Pomelli, J. W. Ochterski, R. L. Martin, K. Morokuma, V. G. Zakrzewski, G. A. Voth, P. Salvador, J. J. Dannenberg, S. Dapprich, A. D. Daniels, O. Farkas, J. B. Foresman, J. V. Ortiz, J. Cioslowski and D. J. Fox, Gaussian 09, Revision B.01, Gaussian, Inc., Wallingford CT, **2010**.
